# Supplementary material for: Parallel encoding of sensory history and behavioral preference during Caenorhabditis elegans olfactory learning
Source: eLife. 2016 Jul 6;5:e14000. doi: 10.7554/eLife.14000 (PMC4935464; doi:10.7554/eLife.14000)
Supplement: Figure 1—source data 1. — DOI: http://dx.doi.org/10.7554/eLife.14000.004 [file elife-14000-fig1-data1.xlsx]

## Sheet: Figure 1 - Source Data 1
Figure 1C Source Data
	Genotype	wild-type					gcy-28d::HisCl1					ins-1(s)::HisCl1					ttx-3(i7)::HisCl1					str-3::HisCl1					unc-4::HisCl1					ins-1(s);str-3::HisCl					ttx-3(i7);str-3::HisCl					ttx-3(i7);unc-4::HisCl					inx-1::HisCl1
		Naïve	Conditioned	Naïve + Histamine	Conditioned + Histamine		Naïve	Conditioned	Naïve + Histamine	Conditioned + Histamine		Naïve	Conditioned	Naïve + Histamine	Conditioned + Histamine		Naïve	Conditioned	Naïve + Histamine	Conditioned + Histamine		Naïve	Conditioned	Naïve + Histamine	Conditioned + Histamine		Naïve	Conditioned	Naïve + Histamine	Conditioned + Histamine		Naïve	Conditioned	Naïve + Histamine	Conditioned + Histamine		Naïve	Conditioned	Naïve + Histamine	Conditioned + Histamine		Naïve	Conditioned	Naïve + Histamine	Conditioned + Histamine		Naïve	Conditioned	Naïve + Histamine
	n	61	63	61	63		36	36	36	36		5	6	5	6		6	6	6	6		4	6	6	6		8	8	8	8		5	5	5	5		5	6	5	6		6	6	6	5		3	4	4
	Mean	0.822656	0.165724	0.819798	0.190987		0.890884	0.240711	0.79706	0.665438		0.952251	0.166006	0.954354	0.400944		0.82564	0.211442	0.777248	0.29197		0.707445	0.244811	0.808046	0.395157		0.937985	0.232935	0.887709	0.597118		0.847405	-0.105696	0.836119	0.0269153		0.7771	0.148079	0.713746	0.220815		0.503416	0.358688	0.541105	0.452867		0.621229	0.1489	0.64649
	s.e.m.	0.0217611	0.0369911	0.0153338	0.0349721		0.0115158	0.0433992	0.0287797	0.0305514		0.0226247	0.0832171	0.0146676	0.0666646		0.0674955	0.184175	0.0905878	0.182325		0.0747306	0.148533	0.0472267	0.144238		0.0127323	0.0979099	0.0357296	0.0607668		0.0498208	0.0536572	0.0457548	0.0441701		0.0346201	0.0630309	0.041915	0.0854026		0.0864456	0.0526217	0.103718	0.0531049		0.0401675	0.131837	0.0154009
	Statistics	P values generated by 2-way ANOVA (interaction of odor exposure and histamine)
		0.627					<0.0001					0.0689					0.6533					0.8422					0.002					0.169					0.304					0.726					0.09588
	Chemotaxis Index	0.880952	0.203125	0.885714	0.244681		0.846154	0.745098	0.854545	0.82		0.961905	0.321429	0.910891	0.474227		0.691057	-0.281481	0.663366	-0.140845		0.8	-0.462963	0.933333	-0.324324		0.931034	0.614035	0.6625	0.465116		0.904762	-0.203125	0.893939	0.134615		0.640625	0.305785	0.746667	0.272727		0.762238	0.53271	0.848485	0.40411		0.7	0.236364	0.673333
		0.653333	0.58	0.829545	-0.0416667		0.872727	0.469027	0.59375	0.683168		1	0	0.977528	0.333333		0.971631	0.809524	0.951049	0.884615		0.852459	0.493151	0.901961	0.558442		0.928571	-0.24	0.875	0.851852		1	-0.15493	0.967742	0.0617284		0.833333	0.0422535	0.650602	0.151899		0.241758	0.273438	0.4375	0.503876		0.568182	-0.214953	0.648148
		0.788889	0.434211	0.789474	0.476923		0.91	0.323944	0.927273	0.405172		0.968254	-0.046875	0.977099	0.180952		0.558282	-0.19084	0.386555	-0.285714		0.656489	0.329114	0.772727	0.507246		0.90625	0.495495	0.911392	0.575472		0.831858	-0.204545	0.695122	0.0813953		0.80303	0.377778	0.584158	0.617647		0.756098	0.330275	0.797872	0.492754		0.595506	0.410256	0.661538
		0.844262	0.329897	0.904	0.372093		0.82	0.166667	0.972727	0.796296		0.965116	0.343511	0.979167	0.59854		0.938931	0.642276	0.956989	0.555556		0.520833	0.285714	0.830882	0.571429		0.87218	0.37	0.84	0.518519		0.705882	-0.0365854	0.820513	-0.115385		0.808511	0.0416667	0.777778	0.15625		0.470588	0.426829	0.605042	0.588235			0.163934	0.602941
		0.862069	0.0145985	0.879518	0.412844		1	0.387755	0.825175	0.827586		0.865979	0.386667	0.927083	0.543103		0.859873	0.318584	0.795082	0.516779			0.280374	0.606557	0.541667		0.969466	0.188235	0.947826	0.693069		0.794521	0.0707071	0.803279	-0.0277778		0.8	0.0175439	0.809524	0.0666667		0.40625	0.420561	0.349398	0.275362
		0.893805	-0.209524	0.823529	0.163265		0.961832	0.0267857	0.846939	0.645161			-0.00869565		0.27551		0.934066	-0.0294118	0.910448	0.221429			0.543478	0.802817	0.516484		0.980392	0.333333	0.96124	0.767857								0.103448		0.0597015		0.383562	0.168317	0.208333
		0.861111	-0.0989011	0.922078	0.642857		0.853211	0.336449	0.845455	0.505495																	0.96063	0.0833333	0.935714	0.589744
		0.695167	0.118943	0.830827	0.116071		0.959596	0.0679612	0.745283	0.362903																	0.955357	0.0190476	0.968	0.315315
		0.744361	0.0776256	0.805556	0.0900901		0.93617	0.552381	0.934579	0.897959
		0.666667	-0.00934579	0.888889	0.0454545		0.966942	-0.038835	0.935185	0.736364
		0.753623	0.00862069	0.826087	-0.189542		0.962963	-0.091954	0.785714	0.571429
		-0.0857143	0.0526316	0.730159	0.124352		0.981308	0.189394	0.879121	0.765306
		0.87931	-0.238806	0.532258	0.407407		0.875	0.300752	0.926316	0.884615
		0.81982	-0.126126	0.584071	0.0384615		0.974138	0.692857	0.8	0.709677
		0.776699	0.10274	0.744	-0.32		0.822222	0.326241	0.94	0.673267
		0.712963	0.150376	0.586466	-0.0227273		0.739437	0.104167	0.367188	0.563025
		0.717949	0.485437	0.682692	0.277778		0.928058	0.769841	0.919753	0.929825
		0.511905	0.114504	0.698113	0.379888		0.713178	0.0787402	0.185567	0.458333
		0.871795	-0.113208	0.833333	0.484127		0.94702	0.431373	0.907801	0.813187
		0.835616	0.581395	0.944882	0.311688		0.779528	0.318681	0.92638	0.953125
		0.968504	0.761905	0.913978	0.347458		0.947368	0.423729	0.830189	0.84
		0.938596	0.533981	0.83	0.564356		0.933775	0.448819	0.870504	0.835443
		0.836735	-0.152174	0.735632	0.0666667		0.914634	0.447674	0.907143	0.668605
		0.793478	0.170732	0.971154	0.433333		0.918033	0.322148	0.930636	0.824427
		0.948718	0.185714	0.967213	0.18018		0.79845	0.0674847	0.865546	0.626316
		0.903226	0.419847	0.902778	0.482353		0.856	-0.0865801	0.704918	0.33871
		0.991597	0.662651	0.967742	0.555556		0.941176	0.428571	0.911111	0.909091
		0.96	-0.252101	0.80625	-0.282353		0.944444	0.370588	0.91129	0.690789
		0.855856	0.0588235	0.813793	0.317647		0.836957	0.00833333	0.766234	0.363636
		0.85	0.569892	0.637363	0.533333		0.884956	0.100671	0.664336	0.377246
		0.632075	0.365854	0.705357	0.568182		0.916667	0.308824	0.860656	0.731707
		0.915584	0.38835	0.923729	0.19		0.9125	-0.192	0.71028	0.630952
		0.931298	0.425	0.852174	0.293578		0.857143	0.280822	0.883212	0.71831
		0.87395	0.491379	0.910959	0.636364		0.831933	-0.333333	0.534351	0.373913
		0.813333	0.271676	0.484615	-0.27193		0.87218	-0.00746269	0.674603	0.516393
		0.967213	0.573333	0.980392	0.448276		0.856115	-0.08	0.550388	0.508333
		0.982143	0.372881	0.707071	0.141414
		0.953125	0.369231	0.873563	0.572816
		0.946429	0.327103	0.886228	0.135135
		0.927419	-0.203704	0.883721	0.336134
		0.946237	-0.176923	0.975806	-0.25
		0.886364	0.45509	0.748299	0.321839
		0.984	0.374046	0.943548	0.29798
		0.861111	0.0909091	0.801471	-0.038961
		0.840336	0.653846	0.886598	0.848739
		0.872	-0.135922	0.882353	0.0153846
		0.902913	-0.189189	0.840336	-0.0852713
		0.904192	0.282759	0.855263	0.17757
		0.8	0.190141	0.87037	0.377622
		0.944444	-0.221374	0.982143	-0.0530973
		0.915094	-0.15625	0.921053	-0.238532
		0.915584	0.256198	0.868613	0.292035
		0.927835	-0.191304	0.720721	-0.212766
		0.913669	0.411765	0.770992	0.178571
		0.736111	-0.190909	0.880597	-0.170732
		0.589404	-0.169355	0.653631	-0.257143
		0.566176	-0.37037	0.631579	-0.285714
		0.954887	-0.0125786	0.982249	0.335938
		0.95122	-0.188525	0.938053	0.40146
		0.592857	-0.045045	0.641509	-0.104575
		0.503704	-0.0689655	0.737589	0.0481928
			0.572464		0.135135
			0.471545		0.0359712
Figure 1D Source Data
	Genotype	gcy-28d::HisCl1					gcy-28d::HisCl1 + ins-1::dsRNA					gcy-28d::HisCl1 + unc-4::dsRNA
		Naïve	Adapted	Naïve + Histamine	Adapted+Histamine		Naïve	Adapted	Naïve+Histamine	Adapted+Histamine		Naïve	Adapted	Naïve+Histamine	Adapted+Histamine
	n	17	17	15	17		13	13	12	13		9	10	9	10
	Mean	0.870044	0.355971	0.794342	0.705732		0.845952	0.426202	0.841328	0.497634		0.84302	0.42775	0.632274	0.552864
	s.e.m.	0.0204508	0.0721783	0.0413166	0.0480342		0.0266283	0.0618266	0.0273393	0.0829878		0.0278163	0.0870208	0.0577927	0.0519118
	Statistics	P values generated by 2-way ANOVA (interaction of odor exposure and histamine)
		9.99829e-05					0.494919					0.014546
	Chemotaxis Index	0.920245	0.471429	0.435484	0.552239		0.822222	0.258065	0.789474	0.333333		1	0.779221	0.825397	0.404255
		0.91866	0.47549	0.835106	0.81592		0.927419	0.706186	0.892045	0.957447		0.92381	0.79646	0.765432	0.855422
		0.920904	0.389222	0.88764	0.844961		0.748538	0.448718	0.687075	0.457627		0.850394	0.442857	0.624204	0.644172
		0.917647	0.722222	0.990099	0.928571		0.679739	0.338462	0.679012	0.133333		0.777778	0.322917	0.534247	0.5
		0.982353	0.73301	0.96875	0.97561		0.922535	0.537634	0.923567	0.693467		0.892157	0.613208	0.261261	0.6
		0.960159	0.544444	0.740741	0.856061		0.922581	0.778409	1	0.898649		0.803191	0.398876	0.759494	0.5625
		0.865	0.216981	0.839695	0.695652		0.821656	0.25	0.935185	0.889535		0.833333	0.5	0.755556	0.694805
		0.920455	0.720165	0.921053	0.86383		0.877358	0.253247	0.812903	-0.0447761		0.756522	-0.0241935	0.552632	0.445122
		0.91	0.461187	0.968421	0.872038		0.695312	0.430769	0.824561	0.338983		0.75	0.0204082	0.612245	0.269504
		0.818182	-0.287938	0.857143	0.531599		0.904412	0.5	0.826087	0.390805
		0.872727	0.106383	0.752174	0.581006		0.915584	0.391566	0.851852	0.474227
		0.861925	0.46	0.797521	0.459016		0.914062	0.221374	0.874172	0.44898
		0.74359	0.319588	0.696335	0.603687
		0.766169	-0.0452489	0.518072	0.557143
		0.672646	0.0526316	0.706897	0.448649
Figure 1E Source Data
	Genotype	wild-type			gcy-28d::unc-103(gf)
		Naïve	Adapted		Naïve	Adapted
	n	8	8		8	8
	Mean	0.607941	0.0651563		0.769561	0.796765
	s.e.m.	0.054	0.0587577		0.043895	0.0423903
	Statistics	P values generated by 2-way ANOVA (interaction of genotype and odor exposure)
					4.41784e-06
	Chemotaxis Index	0.466165	0		0.834286	0.84
		0.554795	0.393939		0.9	0.919355
		0.728814	-0.0202703		0.921348	0.766667
		0.913043	0.00793651		0.822581	0.619048
		0.53	0.0102041		0.670886	0.745283
		0.594595	0.108911		0.559322	0.828571
		0.62931	0.182692		0.686869	0.676471
		0.446809	-0.162162		0.761194	0.978723
Figure 1F Source Data
	Genotype	wild-type			gcy-28d::unc-103(gf)
		Naïve with food	Conditioned with food		Naïve with food	Conditioned with food
	n	8	8		8	8
	Mean	0.207253	0.92037		0.420609	0.948095
	s.e.m.	0.110397	0.0112355		0.0717265	0.00900112
	Statistics	P values generated by 2-way ANOVA (interaction of genotype and odor exposure)
					0.172006
	Chemotaxis Index	0.694915	0.925466		0.402174	0.971074
		0.582609	0.924528		0.708661	0.970339
		0.314961	0.892405		0.610063	0.925311
		-0.0526316	0.96319		0.541284	0.932039
		0.297619	0.945122		0.4	0.948276
		-0.0699301	0.946746		0.293478	0.973684
		-0.0204082	0.89441		0.0555556	0.90404
		-0.0891089	0.871094		0.353659	0.96
[truncated: 21 more columns]
