# Supplementary material for: Parallel encoding of sensory history and behavioral preference during Caenorhabditis elegans olfactory learning
Source: eLife. 2016 Jul 6;5:e14000. doi: 10.7554/eLife.14000 (PMC4935464; doi:10.7554/eLife.14000)
Supplement: Figure 2—source data 1. — DOI: http://dx.doi.org/10.7554/eLife.14000.006 [file elife-14000-fig2-data1.xlsx]

## Sheet: Figure2__SourceData1
Figure 2 Source Data
	Genotype	wild-type			ins-1			ins-1; ins-1::ins-1			age-1			age-1; str-2::age-1
		Naive	Conditioned		Naive	Conditioned		Naive	Conditioned		Naive	Conditioned		Naive	Conditioned
	n	26	26		12	12		4	4		16	17		6	6
	Mean	0.772227	0.092365		0.58739	0.960872		0.697858	0.0514007		0.830484	0.616844		0.592628	0.106632
	s.e.m.	0.035229	0.0720712		0.0684981	0.0115252		0.0481254	0.0560894		0.0216162	0.0429447		0.0837607	0.0393921
	Statistics	P values generated by 2-way ANOVA (interaction of genotype and odor exposure; genotypes are compared to wild-type)
					<0.0001						<0.0001
		P values generated by 2-way ANOVA (interaction of genotype and odor exposure; genotypes are mutant compared to mutant with rescue transgene)
								0.0002						<0.0001
	Chemotaxis Index	0.985185	0.753521		0.899471	0.980769		0.741935	0.153846		0.835294	0.625		0.80303	0.111111
		0.969231	0.444444		0.876712	0.92126		0.555556	-0.105263		0.774648	0.634409		0.788571	0.0747126
		0.716216	-0.222222		0.679739	0.859551		0.727273	0.103448		0.909091	0.910828		0.703947	0
		0.832335	-0.0582524		0.881188	0.954286		0.766667	0.0535714		0.863636	0.708333		0.516949	0.285714
		0.893617	0.148148		0.513274	0.980392					0.791667	0.700535		0.294118	0.107143
		0.861314	0.443299		0.449541	0.940594					0.766467	0.565217		0.449153	0.0611111
		0.83871	0.432749		0.412698	0.983607					0.924419	0.619403
		0.5	0.577236		0.4	0.957627					0.869565	0.568421
		0.708738	0.450549		0.235294	0.961905					0.786127	0.313333
		0.992063	0.798077		0.276316	0.990476					0.947368	0.682927
		0.973684	0.526316		0.738318	1					0.89011	0.718391
		0.896774	0.0689655		0.686131	1					0.805556	0.764706
		0.896552	-0.160839								0.576923	0.708333
		0.943548	-0.0136986								0.833333	0.177914
		0.857955	-0.106195								0.868571	0.433333
		0.873684	-0.0359281								0.844961	0.786458
		0.619048	-0.496644									0.568807
		0.303571	-0.560284
		0.645833	-0.149485
		0.621118	0.045045
		0.802139	0.116564
		0.6875	-0.167568
		0.66129	-0.217687
		0.403101	-0.371681
		0.841379	0.246231
		0.753304	-0.089172
