# Supplementary material for: Parallel encoding of sensory history and behavioral preference during Caenorhabditis elegans olfactory learning
Source: eLife. 2016 Jul 6;5:e14000. doi: 10.7554/eLife.14000 (PMC4935464; doi:10.7554/eLife.14000)
Supplement: Figure 3—source data 1. — DOI: http://dx.doi.org/10.7554/eLife.14000.008 [file elife-14000-fig3-data1.xlsx]

## Sheet: Figure3_SourceData1
Figure 3B, C, D Source Data
	Genotype	wild-type			gcy-28d::unc-103(gf)			age-1 (hx546)
		Naïve	Adapted		Naïve	Adapted		Naïve	Adapted
	n	85	90		79	90		120	119
	Statistics	P values generated by Kolmogorov-Smirnov test within each genotype
		2.7783e-09			0.6682			0.8647
	Nuclear index	0.0508475	0.118881		0.0666667	-0.0075188		0.102881	0.032967
		0.0617284	0.15		0.115152	0.0595238		0.134752	0.032967
		0.0746269	0.15		0.123711	0.0697674		0.139073	0.0837989
		0.083871	0.152941		0.126531	0.0748299		0.141361	0.0948905
		0.111111	0.156627		0.132867	0.0886076		0.146853	0.0948905
		0.115578	0.161765		0.135593	0.105882		0.15	0.101604
		0.121951	0.167702		0.139665	0.106383		0.153846	0.113208
		0.125926	0.185714		0.14094	0.111111		0.168831	0.142857
		0.131474	0.198068		0.141414	0.111111		0.170984	0.162791
		0.142857	0.212435		0.144279	0.112583		0.177305	0.162791
		0.153527	0.216327		0.14554	0.112971		0.177778	0.166667
		0.156463	0.225		0.147826	0.13369		0.179191	0.166667
		0.156757	0.238095		0.15122	0.13382		0.184466	0.172185
		0.163636	0.239316		0.153846	0.135922		0.186207	0.172414
		0.165957	0.243243		0.166667	0.143731		0.1875	0.172414
		0.170213	0.247863		0.166667	0.146853		0.1875	0.173913
		0.174312	0.251701		0.16763	0.146853		0.189189	0.173913
		0.178947	0.254717		0.168724	0.152941		0.191919	0.175258
		0.186667	0.260417		0.171598	0.15508		0.191919	0.18593
		0.188679	0.261364		0.171717	0.155172		0.196581	0.18593
		0.189189	0.264151		0.181818	0.15736		0.204082	0.189189
		0.189474	0.264151		0.18797	0.16129		0.204301	0.190476
		0.193277	0.266667		0.194631	0.168142		0.204301	0.196581
		0.193798	0.267176		0.195402	0.169591		0.206612	0.19697
		0.195402	0.268293		0.197452	0.169643		0.208333	0.19697
		0.19697	0.268293		0.197531	0.170213		0.208333	0.203883
		0.198238	0.269841		0.206612	0.173184		0.211538	0.206704
		0.2	0.271676		0.208	0.183099		0.211538	0.207921
		0.202381	0.273743		0.212121	0.183486		0.214815	0.207921
		0.207101	0.274336		0.216495	0.185567		0.216374	0.208633
		0.209091	0.276018		0.217082	0.2		0.216495	0.208633
		0.212389	0.277419		0.223404	0.2		0.216495	0.210938
		0.213483	0.277778		0.22449	0.201613		0.217391	0.215054
		0.221477	0.283237		0.224806	0.202381		0.217391	0.219512
		0.224138	0.291667		0.236842	0.207317		0.218182	0.219512
		0.226562	0.292398		0.238095	0.207792		0.219512	0.223684
		0.228346	0.294686		0.24031	0.211429		0.219512	0.226277
		0.228571	0.296703		0.241706	0.216495		0.219858	0.226994
		0.230769	0.301587		0.243243	0.220884		0.225806	0.227273
		0.231527	0.301887		0.243902	0.221719		0.226519	0.227273
		0.233333	0.302326		0.244094	0.222222		0.227586	0.227848
		0.233533	0.302326		0.244094	0.238889		0.22963	0.232877
		0.236641	0.302491		0.252336	0.23913		0.22963	0.232877
		0.236994	0.309524		0.254902	0.23913		0.230769	0.232877
		0.238806	0.309942		0.266187	0.240143		0.232323	0.234568
		0.23913	0.318777		0.266332	0.241379		0.232323	0.238095
		0.24031	0.322835		0.270833	0.242424		0.238095	0.238579
		0.241758	0.323944		0.273504	0.243243		0.238095	0.238636
		0.242009	0.324201		0.280488	0.24359		0.238095	0.245283
		0.247525	0.333333		0.280488	0.252174		0.238095	0.245283
		0.25	0.335849		0.284848	0.258964		0.242604	0.245902
		0.251799	0.337838		0.2875	0.260274		0.244094	0.246231
		0.251799	0.338462		0.288136	0.263158		0.254902	0.246377
		0.254237	0.338521		0.288889	0.2657		0.254902	0.248322
		0.256281	0.339535		0.293173	0.269231		0.257143	0.248322
		0.258964	0.341176		0.293478	0.269663		0.257143	0.24878
		0.261538	0.342342		0.294118	0.271676		0.259259	0.252033
		0.261993	0.351515		0.298851	0.273885		0.262295	0.252033
		0.263158	0.354582		0.299578	0.274725		0.262295	0.253731
		0.265625	0.35461		0.3	0.277778		0.263158	0.255605
		0.266055	0.355705		0.30137	0.278481		0.263158	0.255605
		0.267176	0.36		0.308271	0.278689		0.263736	0.256757
		0.275362	0.362319		0.309735	0.278846		0.264368	0.259843
		0.275472	0.364706		0.309942	0.280576		0.264368	0.271028
		0.28	0.366906		0.312977	0.283019		0.26506	0.272727
		0.283019	0.368932		0.317365	0.285714		0.266667	0.27451
		0.284211	0.369863		0.317919	0.289941		0.268571	0.27451
		0.285714	0.373333		0.319298	0.294521		0.270833	0.276596
		0.286713	0.379747		0.324841	0.294574		0.270833	0.276596
		0.297521	0.382979		0.325301	0.295019		0.270833	0.277311
		0.298507	0.383721		0.328244	0.295238		0.271318	0.277311
		0.299065	0.383886		0.333333	0.30719		0.272727	0.279279
		0.304762	0.386503		0.344398	0.311475		0.272727	0.279279
		0.318182	0.387205		0.345912	0.319149		0.282759	0.279352
		0.318841	0.387978		0.35	0.321555		0.282759	0.28
		0.321429	0.388235		0.365462	0.325967		0.284211	0.28125
		0.323944	0.393939		0.366197	0.327273		0.284211	0.282051
		0.324201	0.395062		0.368889	0.330508		0.285714	0.282353
		0.333333	0.39726		0.377483	0.33617		0.287879	0.282353
		0.348624	0.403727			0.340824		0.290323	0.2875
		0.356322	0.406504			0.341176		0.290323	0.2875
		0.362205	0.41784			0.352273		0.294118	0.288889
		0.401575	0.42623			0.353952		0.29927	0.28972
		0.415584	0.426471			0.355828		0.302857	0.28972
		0.423729	0.434599			0.369295		0.302857	0.295337
			0.440476			0.373737		0.303571	0.303371
			0.442231			0.380117		0.310345	0.303371
			0.462555			0.383648		0.311321	0.304348
			0.518072			0.393617		0.313131	0.313609
			0.518987			0.406977		0.313253	0.318841
								0.313253	0.318841
								0.313869	0.322404
								0.315068	0.323383
								0.315068	0.327273
								0.321429	0.329268
								0.321429	0.333333
								0.322034	0.333333
								0.322581	0.33617
								0.322581	0.337748
								0.324503	0.339535
								0.325581	0.345912
								0.325581	0.345912
								0.328125	0.351648
								0.341463	0.354037
								0.345679	0.358209
								0.346154	0.363636
								0.350427	0.364017
								0.350427	0.375887
								0.352518	0.375887
								0.352518	0.391304
								0.357664	0.391304
								0.37234	0.392405
								0.37234	0.392405
								0.373626	0.395062
								0.375	0.410959
								0.376518	0.410959
								0.387097	0.411371
								0.387097	0.418182
								0.4	0.441341
								0.448
