# Supplementary material for: Parallel encoding of sensory history and behavioral preference during Caenorhabditis elegans olfactory learning
Source: eLife. 2016 Jul 6;5:e14000. doi: 10.7554/eLife.14000 (PMC4935464; doi:10.7554/eLife.14000)
Supplement: Figure 4—source data 2. — DOI: http://dx.doi.org/10.7554/eLife.14000.011 [file elife-14000-fig4-data2.xlsx]

## Sheet: Figure4_SourceData2
Figure 4C, D Source Data
	Concentration	11 nM			111 nM			1µM			11µM			111µM			1mM					Concentration	11 nM			111 nM			1µM			11µM			111µM			1mM
		Naïve	Conditioned		Naïve	Conditioned		Naïve	Conditioned		Naïve	Conditioned		Naïve	Conditioned		Naïve	Conditioned					Naïve	Conditioned		Naïve	Conditioned		Naïve	Conditioned		Naïve	Conditioned		Naïve	Conditioned		Naïve	Conditioned
	n	25	23		24	25		22	25		24	25		25	26		25	26				n	16	10		24	17		23	22		24	26		22	26		15	26
	Mean	0.20495	0.0304834		0.498809	0.167842		0.771759	0.501605		0.792002	0.706912		0.839291	0.685295		0.655984	0.766793				Mean	8.21875	14.06		3.55833	5.61765		12.2043	2.9		22.4708	9.80385		48.4227	12.0885		140.56	36.8769
	s.e.m.	0.0408222	0.0290296		0.0427978	0.0365366		0.0289068	0.0460979		0.0207107	0.0420031		0.0243038	0.0342401		0.0494263	0.0274178				s.e.m.	3.03855	7.49507		0.507299	2.14429		1.58726	0.238774		1.8343	3.04534		4.72072	1.11024		13.33	3.92286
	Statistics	P values generated by t-test with correction for unequal variance																				Statistics	P values generated by t-test with correction for unequal variance
		0.00116141			4.49702e-07			1.35355e-05			0.0778158			0.000648387			0.0573756						0.483971			0.362512			6.62375e-06			0.000953874			1.18412e-07			1.13508e-06
	Response magnitude	0.198595	0.0193477		0.591058	0.391896		0.792047	0.61045		0.923712	0.785655		0.899446	0.721397		0.813166	0.80583				Recovery Time	1.6			2.2	5.2		7.5	3.3		14.3	13.5		60.9	17.5			67.4
		-0.155106	0.239375		0.482649	0.352095		0.666232	0.44917		0.822857	0.544313		0.899809	0.460687		0.820263	0.549848					3.7	1.4		2	1.1		9.1	4.1		25.6	60.4		51.9	11.2		180.8	14.7
		0.481726	-0.0122366		0.193498	0.126381		0.517893	0.73525		0.614224	0.168943		0.704891	0.43837		0.736749	0.597188					26.3			0.8			5.1			24.2	3.2		39.4	8.8		200.9	32.6
		0.403984	0.040205		0.448854	0.0569138		0.880749	0.612597		0.732875	0.893748		1.02191	0.83487		0.548151	0.799442					3.2			2.7	1.5		19	3		17.1	5.8		62.5	13		200.4	27.8
		-0.120697	-0.065263		0.49459	0.171752		0.83309	0.493709		0.842989	0.758739		0.712693	0.801466		0.86345	0.871884					48	75.3		7.5			22.9	3.2		38.2	2.8		34.3	6.2			17.1
		0.279215	0.11174		0.453112	0.125851		0.731697	0.623933		0.78406	0.844006		0.807127	0.783977		0.549231	0.867645					6.6			3.1	4.5		15.2	3.2		32.9	5.1		64.9	10.3		175.8	16.5
		0.284769	-0.18407		0.376123	0.264934		0.677504	0.66621		0.611139	0.692094		0.605834	0.77952		0.381295	0.671915											31.7	3		33.1	2.4		63.5	4.7			17.1
		0.525134	0.106249		0.80152	-0.0466089		0.83736	0.612649		0.66074	0.720932		0.862474	0.766309		0.933588	0.840604					4.7			2.6	7.7		19.3	5.5		13.1	13.2		20.5	16.7		52.9	40.1
		0.348487	0.163223		0.180923	0.247568		0.866404	0.623451		0.8405	0.837648		0.870411	0.717553		0.85722	0.826728					1.5	0.5		5.7			11.6	3.1		23.5	8		37.8	11.5		79.3	29.5
		0.148975	-0.0303131		0.11887	0.149854		0.827523	0.419056		0.985742	0.855236		0.988242	0.355624		0.310535	0.724671						34.4		3.1	3.5		5.2	2.1		28.3	3.8			2.5		140.6	8.6
		0.0812866	0.0475339		0.648889	0.0911273		0.796251	-0.0658493		0.604257	0.180016		0.52925	0.865406		0.634347	0.939096								1.9	1.3			4.4		29.9	1.5		70.3	11.3			38.2
		0.530921	0.025001		0.300467	0.33561		0.963545	0.638971		0.803382	0.948998		0.805532	0.291855		0.0182724	0.562475					6.8			12.1			21.7			40.2	3.4			14.3			64.6
		0.193486	0.106526		0.645562	0.316785		0.563568	0.472842		0.819697	0.727699		0.869574	0.968521		0.630809	0.820562					4.7			2.8	3.4		13.6	2.8		19.2	8.3		61.6	14.8		210.1	23.1
		0.156878	-0.170279		0.583314	0.134981		0.493495	0.601766		0.867629	0.797937		0.888053	0.94461		0.740659	0.849623								4.7	1.7		13.6	2.9		23	5.5		77.7	25.8			63.4
		0.156031	-0.0180364		0.644308	-0.235414		0.88007	0.766062		0.712073	0.7727		0.888309	0.614164		0.50751	0.910976						9.4		3.3	1.8		6.7	2.6			11		77.5	16.4			85.8
		0.149577	-0.170374		0.695684	0.288722		0.667105	0.653759		0.915964	0.813143		0.688905	0.78965		0.174764	0.918675								6.9			11.1	3.9		29.7	5.2			19.8			43.3
		0.52122	-0.0316151		0.874897	0.318664		0.885151	0.692082		0.740324	0.614421		0.85774	0.772752		1.01843	0.772461					5.8	2.6		2.8	0.9		5.8	1.9		15.8	3.3		25.6	12.3		146.8	23.2
		0.101196	0.356585		0.452653	0.0733076		0.912022	0.128998		0.7831	0.856281		0.831038	0.769506		0.704898	0.837979								4.5	4.5		5.9	3.2		17.3	4.5		30.9	10.1		120.6	23.7
		0.194737	0.0704865		0.333657	0.255892		0.625945	0.473173		0.782139	0.81581		0.834205	0.739785		0.778745	0.365968					4			2.2	4.3		23.3			21.8	2		22.6	2.8		78.1	21.6
		0.196499	-0.0846794		0.768739	0.341725		0.857962	0.796105		0.830443	0.948822		0.952474	0.494176		0.503093	0.680489					8.7			1.4				1.8		27.2	62.1		86.6	13.7			50.8
		0.296412	0.262695		0.304763	0.510846		0.931415	0.504398		0.77909	0.515816		0.954382	0.59361		0.611125	0.600387					1.2	3.2		3.3	3.4		11.8	4.1		19.7	4.3		70.8	5			26.3
		0.25102	0.0423088		0.265503	-0.167823		0.771659	0.381501		0.823678	0.621039		0.700735	0.757097		0.587843	0.701382					1.9	3.8		1.1	38.9		3.6	0.7		4.7	1.7		13.9	13.3		138.7	25.1
		-0.0190748	-0.123291		0.564312	-0.0284103			0.207428		0.787947	0.36364		0.949699	0.585071		0.913014	0.915281						6.9		1.7			4.1	1.4		7	4.9		20.7	6.6		78	48.5
		-0.250455			0.747479	0.205443			0.496612		0.939479	0.779711		0.947435	0.534743		0.796967	0.820215								2.6			8.4	1.3		15.8	3.1		44.8	18.9		187.4	60.9
		0.168932				-0.0860461			-0.0541954			0.815457		0.912103	0.830722		0.965467	0.878303					2.8			4.4	3.5		4.5	2.3		17.7	4.3		26.6	8.4		118	29.4
															0.60624			0.806992						3.1			8.3						11.6			18.4			59.5
