# Supplementary material for: Parallel encoding of sensory history and behavioral preference during Caenorhabditis elegans olfactory learning
Source: eLife. 2016 Jul 6;5:e14000. doi: 10.7554/eLife.14000 (PMC4935464; doi:10.7554/eLife.14000)
Supplement: Figure 5—source data 2. — DOI: http://dx.doi.org/10.7554/eLife.14000.014 [file elife-14000-fig5-data2.xlsx]

## Sheet: Figure5_SourceData2
Figure 5B, C, E, F, H, I Source Data
gcy-28d::unc-103(gf), conditioned	Concentration	11 nM			111 nM			1µM			11µM			111µM			1mM					Concentration	11 nM			111 nM			1µM			11µM			111µM			1mM
		Naïve	Conditioned		Naïve	Conditioned		Naïve	Conditioned		Naïve	Conditioned		Naïve	Conditioned		Naïve	Conditioned					Naïve	Conditioned		Naïve	Conditioned		Naïve	Conditioned		Naïve	Conditioned		Naïve	Conditioned		Naïve	Conditioned
	n	16	13		17	13		17	13		17	12		17	13		17	13				n	10	5		16	8		17	13		17	13		14	13		12	13
	Mean	0.255516	0.0928429		0.397718	0.187139		0.762424	0.465235		0.755918	0.695847		0.831105	0.731931		0.601549	0.785394				Mean	5.42	5.6		2.50625	2.975		10.2824	2.33077		18.3588	8.11538		35.5	10.7769		107.525	37.7077
	s.e.m.	0.0469134	0.0308468		0.0679015	0.0453522		0.0312582	0.0338797		0.0346898	0.03587		0.0293544	0.0396715		0.0602766	0.0290285				s.e.m.	1.50833	2.18815		0.418874	0.527037		2.11076	0.823251		3.16186	4.98675		5.83916	1.7834		19.7577	10.8892
	Statistics	P values generated by t-test with correction for unequal variance																				Statistics	P values generated by t-test with correction for unequal variance
		0.00772703			0.015813			6.99386e-07			0.23962			0.0561134			0.0115511						0.947682			0.496425			0.00213049			0.097404			0.000999238			0.00649518
	Response magnitude	0.425811	0.119848		0.18029	0.101626		0.606455	0.669227		0.553807	0.766263		0.623361	0.812613		0.38908	0.9491				Recovery Time	2.2			1	3		2.6	3.4		6.8	4		19.8	14		33	33.6
		0.217535	0.317812		0.765655	0.483455		0.790186	0.491784		0.90241	0.830791		0.978958	0.774219		0.835785	0.82049					4.6	0.5		7.3	2.2		15.2	0.8		22.4	5.8		47.4	14.1		195.3	34
		0.412537	0.147037		0.609668	0.355508		0.65756	0.361405		0.654517	0.675514		0.638141	0.821511		0.761962	0.882367						8.2		3.2	1.7		3.8	3.6		20.2	5.9		25.2	23.6		88.6	151.3
		0.322759	0.0344624		0.247654	-0.125955		0.841011	0.259433		0.790357	0.655895		0.760996	0.465451		0.500378	0.748896					3.9			0.9			6	0.5		21.8	5.4		43.5	4.2		218.1	32.5
		0.506902	0.0725618		0.144233	0.172713		0.857417	0.342044		0.836857	0.949913		0.902095	0.75807		0.452196	0.764711					0.5			2.1			20.1	1.7		32.9	2.8		88.7	7.4			14.9
		0.643471	-0.127501		0.663061	0.0974221		0.901227	0.409124		0.73621	0.636738		0.845453	0.904034		0.683891	0.866007					9.1			4.2			8.4	0.5		17.6	3.1		61.1	9.8			18.7
		0.193162	0.0511759		0.504119	-0.00909331		0.640191	0.479008		0.528481	0.676721		0.947993	0.694696		0.770768	0.747338					1.9			1.9			14.9	1.8		16.1	2.5		31.9	13.1		136.5	32.4
		0.261399	-0.0279838		-0.14277	0.214713		0.801907	0.499634		0.938722	0.494395		0.912215	0.692182		0.675745	0.747206					4.2				3.5		2.4	1.4		9.7	1.4		39.3	8		123.1	17.5
		0.00932336	0.118141		0.737392	0.133379		0.893738	0.387272		0.829392	0.72654		0.774986	0.815867		0.00319816	0.686263								4.2	6.3		27.5	1.3		54.1	1.3			8.1			15.2
		0.182076	0.211171		0.506522	0.20342		0.684826	0.538153		0.782146	0.683669		0.983528	0.559275		0.908755	0.703784					4.6	4.3		1.2	1.8		3.3	0.9		7.9	1.6		18.3	2.8		73.8	20.6
		-0.0171433	0.172839		0.679265	0.342594		0.966723	0.685623		0.943398	0.738802		0.967283	0.948887		0.178417	0.917344						2.3		3	2.2		11.9	2.3		31.2	2.6			9.6			30.4
		0.128355	0.0909549		0.390356	0.130051		0.617619	0.507014		0.492425	0.514925		0.795712	0.529588		0.405719	0.810996						12.7		2.7			27.8	11.6		22.1	67.7			21.7			85
		0.389563	0.0264382		0.646579	0.332974		0.561714	0.418328		0.810536			0.795253	0.738708		0.723412	0.56562					6			1.7	3.1		2.5	0.5		3.9	1.4		16.5	3.7		62.1	4.1
		0.0818676			0.491305			0.796233			0.854368			0.871153			0.881316									0.7			2.3			3.3			8.7			35.6
		0.287896			-0.0124276			0.922186			0.796599			0.781226			0.69989						17.2			1.3			5.8			8.5			20.7			62.8
		0.0427387			0.278489			0.812388			0.577198			0.923398			0.726922									2.1			16.7			25.7			54.2			211.8
					0.0718066			0.609826			0.823181			0.62703			0.628892									2.6			3.6			7.9			21.7			49.6
age-1 (hx546), conditioned	Concentration	11 nM			111 nM			1µM			11µM			111µM			1mM					Concentration	11 nM			111 nM			1µM			11µM			111µM			1mM
		Naïve	Conditioned		Naïve	Conditioned		Naïve	Conditioned		Naïve	Conditioned		Naïve	Conditioned		Naïve	Conditioned					Naïve	Conditioned		Naïve	Conditioned		Naïve	Conditioned		Naïve	Conditioned		Naïve	Conditioned		Naïve	Conditioned
	n	24	23		24	24		24	23		24	24		24	24		23	24				n	11	17		18	15		23	20		24	24		19	22		12	23
	Mean	0.133766	0.327656		0.262498	0.238387		0.573065	0.443061		0.751284	0.424997		0.825224	0.662294		0.558426	0.70289				Mean	15.9545	5.27059		13.1833	10.4333		8.32174	7.12		19.8708	7.15		46.6789	20.7364		149.175	68.2
	s.e.m.	0.0567336	0.0609915		0.0588196	0.0634364		0.045428	0.0523886		0.0282589	0.0594858		0.0266331	0.0299756		0.0627392	0.0497727				s.e.m.	8.03957	1.36567		4.62558	3.78737		1.73281	1.38895		2.53505	1.30556		3.97797	1.55527		11.8756	7.85426
	Statistics	P values generated by t-test with correction for unequal variance																				Statistics	P values generated by t-test with correction for unequal variance
		0.0245288			0.781729			0.0674902			2.12774e-05			0.00018971			0.0783625						0.217875			0.648761			0.591404			8.31402e-05			3.13111e-06			1.26304e-05
	Response magnitude	-0.235144	0.137907		0.416254	-0.0937532		0.801823	0.133515		0.832098	-0.243749		0.803618	0.54443		0.730987	0.979467				Recovery Time				2.3			7.4			14	7.7		28.3	29.6			106.4
		-0.103902	0.20155		0.361817	0.168807		0.587339	0.144831		0.594142	0.40183		0.807111	0.445901		0.310697	0.51514								4.1	2.4		10.7			29.3	4.4			12.6		144.6	91.8
		-0.184795	0.549887		0.398732	0.0831737		1.01371	0.474992		0.959005	0.520443		0.70749	0.57966		-0.016987	0.704045						10.6		2.6	17.2		24.8	4.3		49	24			19.7			66.4
		0.0649499	0.342735		0.371374	0.269715		0.848065	0.0847471		0.655524	0.496482		0.627284	0.579218		0.0807426	0.517436						1.5		3.2	7.8		31.7	0.5		35	5.3			26.7			75.3
		-0.507439	0.618019		0.519969	-0.0132304		0.653933	0.599362		0.89833	0.469312		0.944374	0.665568		0.184984	0.868905						3.2		2.3	2.6		3.2	4.3		12.2	4.5		21.2	22.5			70.1
		-0.299786	0.0256166		0.332919	0.403037		0.642612	0.202012		0.818093	0.453734		0.931372	0.253678		0.416671	0.92976								1.6			6.3	18		9.6	26.5		39.8	5.6		87.6	122
		0.40291	0.155575		0.368624	0.476747		0.488908	0.90438		0.731903	0.458094		0.812141	0.912085		0.567948	0.878101					42.5	1.3		63.4	17.3		4.2	3.3		10.7	4.3		79.1	19.3		156	56.4
		0.290452	0.299486		0.240598	0.709023		0.612898	0.789032		0.801702	0.722877		0.742077	0.911538		0.786121	0.929177						3.9		53	0.5		7.5	4.4		25.3	7.3		43.3	15.4			32.2
		0.290043	0.416311		0.00045616	-0.00647257		0.235221	0.25152		0.894384	0.215364		0.908329	0.632119		0.807475	0.64245						10					2	3.1		9.4	9.1		44.9	26.9		151	133.9
		0.072161	0.90839		0.133562	-0.0443142		0.816909	0.83393		0.835014	-0.503188		0.800737	0.815953		1.01308	0.770554					88.2	10.1					5.5	19.9		5.6	2		29.8	13		137.7	44.8
		0.158417	0.39709		-0.131496	0.175931		0.430405	0.217381		0.951533	0.357458		1.04261	0.556862		0.859384	0.720508					13.7	5.8			8.3		5	4.7		11.6	6.9		66.3	36		101.2	129.9
		0.429644	-0.0102058		0.18615	0.0518374		0.37499	0.241026		0.710203	0.171745		0.862299	0.623183		0.726079	0.913879					2.3			43.4			3.3	5.1		17.2	2.1		57.9	25.3			122.6
		-0.187087	-0.0155223		-0.120057	0.0281531		0.574194	0.514713		0.847955	0.607718		0.87931	0.612989		0.89493	0.559674								3.9			3.6	3.3		9.6	6.4		44.9	14.3		160.4	33.3
		0.26962	0.465318		-0.0358223	0.542057		0.381311	0.839437		0.832909	0.722602		0.813588	0.78242		0.687611	0.704705						4.1			2.2		5.1	3.7		13.3	7.2		51	21.9			31.2
		0.307655	-0.0387698		-0.490287	0.0909998		0.14971	0.422076		0.778042	0.395127		0.875908	0.575848		0.0103185	0.816647						0.5			20.8		10.3	3.8		36.2	2.7			19.9			97.9
		0.572643	0.346913		0.0652985	0.260812		0.243283	0.32742		0.544177	0.619386		0.730032	0.583907		0.416564	0.0494642					3.8	23.2		26.8			2.6	1.2		10.4	5.1		80.7				4
		0.0395456	0.0402436		0.520059	0.129738		0.630131	0.436089		0.448276	0.486765		0.561733	0.61212		0.547366	0.00145666								5.3	57.6		27.5	12.7		7.9	3.8		34.1			199
		0.292157	0.2576		0.574151	0.516468		0.600397	0.63327		0.807002	0.572149		0.993279	0.671144		0.92684	0.690453					2.7	4.4		3	11.5		3.4	20		17.2	16.1		39	24.3		85.1	78.9
		0.121513	0.661204		0.158944	0.827246		0.451545	0.4315		0.530588	0.59432		0.651571	0.767435		0.501116	0.805999					4.6	3.1		9.9	3		1.6	10.7		26.7	3.6		52.5	14.7		189.5	27.7
		0.363743	0.702869		0.463394	0.570561		0.851448	0.370932		0.803626	0.55697		0.971719	0.781096		0.689575	0.720638					2.3	1.7		1.6	1.2		10.1	12.7		21.4	2.1		63.9	15.3			25.2
		0.386677	0.859123		0.356358	0.764369		0.332274	0.690764		0.654501	0.76023		0.725245	0.770017		0.665986	0.852268					5.7	2.4			2.8			2.4		25	5.4		39.9	15			28.2
		-0.0360932	-0.137918		0.923924	-0.282233		0.861128	0.135508		0.853883	0.248748		1.00422	0.681488		0.76388	0.739961						0.9		4.3			8.3			22.9	1.6		50.6	23		168.9	68.4
		0.198317	0.352668		0.373767	0.368369		0.611205	0.511965		0.642527	0.640318		0.659466	0.75736		0.272422	0.844302					6.2	2.9		4.9	1.3		5.8	4.3		48.5	4.3			21.8		209.1	49.1
		0.504191			0.311252	-0.275751		0.560115			0.605394	0.475198		0.949871	0.779038			0.71436					3.5			1.7			1.5			8.9	9.2		19.7	33.4			72.9
WT, conditioned with food	Concentration	11 nM			111 nM			1µM			11µM			111µM			1mM					Concentration	11 nM			111 nM			1µM			11µM			111µM			1mM
		Naïve+food	Conditioned+food		Naïve+food	Conditioned+food		Naïve+food	Conditioned+food		Naïve+food	Conditioned+food		Naïve+food	Conditioned+food		Naïve+food	Conditioned+food					Naïve+food	Conditioned+food		Naïve+food	Conditioned+food		Naïve+food	Conditioned+food		Naïve+food	Conditioned+food		Naïve+food	Conditioned+food		Naïve+food	Conditioned+food
	n	9	8		9	11		10	12		11	11		11	11		11	12				n	1	1		9	5		10	11		11	11		10	12		7	12
	Mean	-0.0731892	0.0040825		0.434801	0.017049		0.578094	0.452557		0.617485	0.663473		0.721902	0.74278		0.623213	0.747137				Mean	20.1	3.9		1.92222	13.22		4.9	2.02727		12.7727	4.00909		35.1	11.2833		118.9	27.2333
	s.e.m.	0.101512	0.0123794		0.0645158	0.0495156		0.0357107	0.065658		0.046479	0.070134		0.0476987	0.0622526		0.054739	0.0685129				s.e.m.	#DIV/0!	#DIV/0!		0.424519	11.5017		1.2025	0.554501		3.20406	0.748994		5.83733	2.04694		15.0679	6.42705
	Statistics	P values generated by t-test with correction for unequal variance																				Statistics	P values generated by t-test with correction for unequal variance
		0.470937			0.000103178			0.111656			0.591619			0.792986			0.172704						#DIV/0!			0.381732			0.0496232			0.0219176			0.00260774			0.000462867
	Response magnitude	-0.0331427	0.00732808		0.544268	0.065203		0.615674	0.349164		0.52022	0.715086		0.772244	0.831964		0.702523	0.606978				Recovery Time				1.5	2.4		2.1	0.5		1	5.2		13.4	11.3		53.3	19.7
		-0.124407	0.0441013		0.433674	0.0319637		0.477178	0.539377		0.475151	0.787057		0.538519	0.808085		0.460755	0.837713								1.5	1.3		3.8			16.9			28.5	14.9		159.4	39.3
		-0.420185	0.0257496		0.549116	0.00570108		0.697185	0.894174		0.910989	0.928467		0.904542	0.608848		0.836283	0.754414								0.9	2.7		2.4	3.3		6.9	9.2		24.6	16.8		121.4	39.2
		0.168827	-0.0132381		0.461195	0.0417857		0.704816	0.45266		0.579539	0.577089		0.68929	0.946587		0.522703	0.77646								1.2			4.8	0.5		4.5	2		24.7	3.6		156	5.4
		-0.678387	0.0154354		0.487505	0.323677		0.386481	0.778967		0.48558	0.843346		0.532055	0.874978		0.449526	0.9329									0.5		3.2	1		32.3	1.4		62.3	4.1			9.3
		0.312651	-0.0356589		-0.00753896	0.10741		0.668478	0.574876		0.622027	0.766537		0.894667	0.784824		0.81352	0.920232								1.9				4.5		16.7	5.5		54.4	23			53.5
		0.032713	-0.0519367		0.522914	0.132198		0.596252	0.40551		0.733988	0.639674		0.75471	0.69404		0.752589	0.874622								2.3			2.7	5.5		10.8	6.9		24.8	18.7		138	77.5
		0.0965006	0.0408792		0.64318	-0.23528		0.563343	0.215933		0.527421	0.782786		0.485622	0.848106		0.711598	0.137747					20.1						6.3	1.6		9.3	2.6		25.7	6.8		127.4	10.1
		-0.0132719			0.278893	-0.274416		0.645125	0.399259		0.468741	0.766543		0.75361	0.843134		0.566997	0.928563								2.7			7.8	3.4		4.7	4		66	18.7			33.9
						-0.0312841		0.426403	0.345093		0.860416	0.364458		0.951214	0.74563		0.268649	0.841101						3.9		4.8	59.2		14.2	1.1		31.4	3.7			6.1			8.9
						0.0205812			0.424229		0.608258	0.127159		0.664452	0.184383		0.770201	0.886402								0.5			1.7	0.9		6	2		26.6	10.3		76.8	22.7
									0.0514405									0.468514												0			1.6			1.1			7.3
