# Supplementary material for: Parallel encoding of sensory history and behavioral preference during Caenorhabditis elegans olfactory learning
Source: eLife. 2016 Jul 6;5:e14000. doi: 10.7554/eLife.14000 (PMC4935464; doi:10.7554/eLife.14000)
Supplement: Figure 6—source data 1. — DOI: http://dx.doi.org/10.7554/eLife.14000.016 [file elife-14000-fig6-data1.xlsx]

## Sheet: Figure6_SourceData1
Figure 6B, D, F, H, J Source Data
	genotype (neuron)	N2 (AWC)			gcy-28d::unc-103(gf) (AWC)			age-1 (AWC)			N2 (AWC)			N2 (AIB)
		Naive	Conditioned		Naive	Conditioned		Naive	Conditioned		Naïve+food	Conditioned+food		Naive	Conditioned
	n	11	11		9	10		7	8		12	14		9	9
	Mean	0.147758	0.0105115		0.0718994	0.0690444		0.317106	0.23506		0.0654992	0.203301		0.134532	0.143504
	s.e.m.	0.0258657	0.0208346		0.014196	0.0222849		0.0343627	0.0173725		0.0272511	0.0234959		0.0302576	0.0223918
	Statistics	P values generated by t-test with correction for unequal variance
		0.000559324			0.915387			0.06			0.000869143			0.814899
	Induced reversal frequency	0.113402	-0.0206186		0.031746	0.105263		0.178947	0.230769		0.226891	0.19084		0.258333	0.115044
		0.133333	0.0707071		0.0530973	0.0306122		0.431034	0.144231		0.0603448	0.0625		0.203252	0.210084
		0.0588235	0.06		0.0652174	0.137615		0.312	0.280702		0.166667	0.097561		0.168	0.260504
		0.182692	0.0865385		0.0506329	0.184211		0.294118	0.226087		0.0866142	0.252252		0.17757	0.148148
		0.097561	0.0075188		0.059322	0.0932203		0.283186	0.229358		0	0.146789		0	0.190476
		0.298246	-0.0940171		0.0818182	0.040404		0.438017	0.272727		-0.042735	0.213675		0.207921	0.128205
		0.0168067	0.0234375		0.15894	-0.0327869		0.282443	0.29661		-0.0564516	0.259259		0.122807	0.0458716
		0.152	-0.0423729		0.119048	0.116788			0.2		0.024	0.268908		0.0322581	0.0769231
		0.112069	-0.0780142		0.0272727	0.0416667					0.134454	0.373984		0.0406504	0.116279
		0.176	0.121495			-0.0265487					0.0638298	0.235294
		0.284404	-0.0190476								0.170455	0.315789
											-0.0480769	0.118421
												0.183673
												0.127273
